# Supplementary material
Source: Springer Nature journal article supplement (https://www.springermedizin.de/resource/supplementary/12916_2009_214_MOESM3_ESM.pdf/9599408)

**Id, Sex, Study name**

**Relative Risk  
95% CI**

**Relative Risk  
95% CI**

**USA**

10 M Martinez et al 1969

11 F Martinez et al 1969

19 M Morris Brown et al 1988

**Subtotal (95% CI)**

**SCANDINAVIA**

5 M Norway cohorts

6 M Swedish construction workers

22 M Lewin et al 1998

23 M+F Lagergren et al 2000

**Subtotal (95% CI)**

**Total (95% CI)**

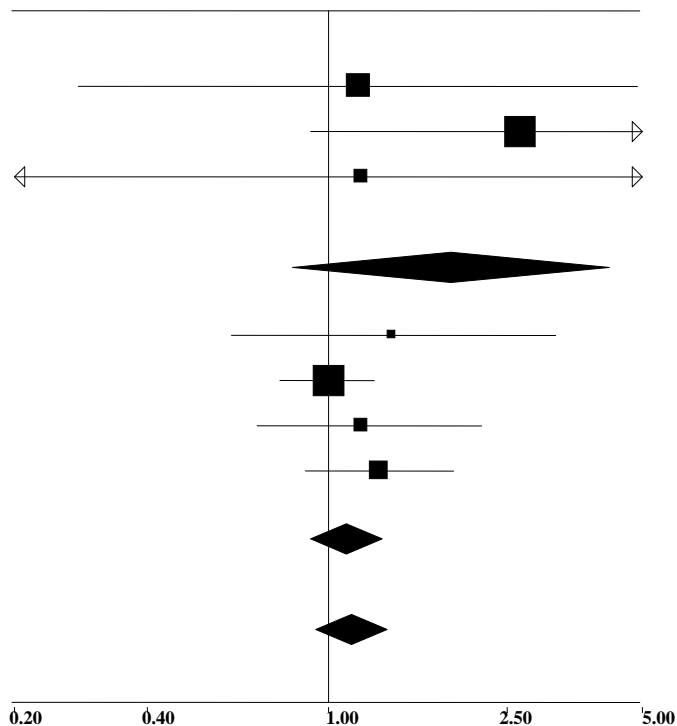

Supplement: MOESM3 [file 9599408]
